# Supplementary material
Source: Springer Nature journal article supplement (https://www.springermedizin.de/resource/supplementary/12916_2012_753_MOESM1_ESM.pdf/9598254)

### Biological state index (Ibs) values for the last 15,000 years

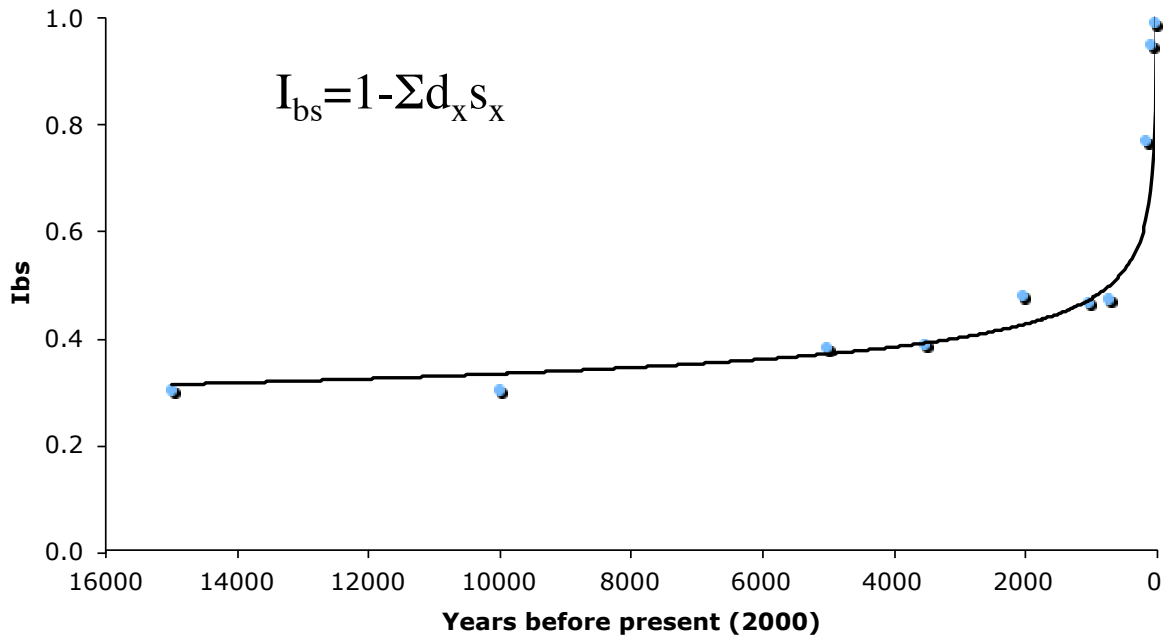

Supplement: MOESM1 [file 9598254]
